# Supplementary material
Source: ML conference proceedings conference paper supplement (https://openaccess.thecvf.com/content/WACV2022/html/Hagemann_Modeling_Dynamic_Target_WACV_2022_paper.html)
Supplement: Supplementary file 1 [file Hagemann_Modeling_Dynamic_Target_WACV_2022_supplemental.pdf]

# Supplementary Material

## Modeling dynamic target deformation in camera calibration

Annika Hagemann  
 Robert Bosch GmbH  
 Computer Vision Research Lab  
 annika.hagemann@de.bosch.com

Moritz Knorr  
 Robert Bosch GmbH  
 Computer Vision Research Lab

Christoph Stiller  
 Institute of Measurement & Control Systems  
 Karlsruhe Institute of Technology

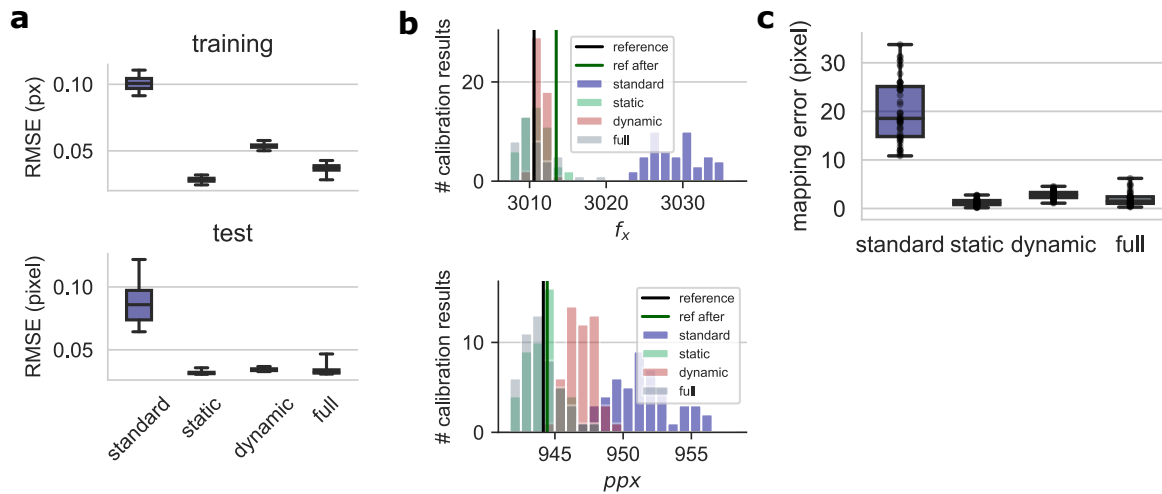

Figure 1. Calibration results on the reference dataset, where the target is lying statically on the ground while the camera is being moved. **a** RMSE on the calibration dataset (training) and the test dataset (test). **b** Distribution of the estimates of two exemplary parameters (focal length  $f_x$  and principal point  $ppx$ ). **c** Mapping error of calibration results w.r.t. reference calibration.

| target    | calibration method | loop closure RMSE (px) |
|-----------|--------------------|------------------------|
| reference | standard           | $12.4 \pm 2.5$         |
| reference | static             | $1.7 \pm 0.6$          |
| reference | dynamic (ours)     | $1.0 \pm 0.4$          |
| reference | full (ours)        | $2.5 \pm 1.3$          |

Table 1. Reprojection error (root mean squared error, RMSE) in the Structure-from-Motion experiment. The table corresponds to table 1 in the main paper, and shows the corresponding results on the reference dataset where the target is lying statically on the ground. The error reflects the loop closure error of the trajectory in image space. The values are mean and standard deviation across 50 calibrations.

| target | maximum out-of-plane deformation (m) |
|--------|--------------------------------------|
| T1     | $0.0026 \pm 0.0012$                  |
| T2     | $0.0017 \pm 0.0024$                  |
| T3     | $0.0030 \pm 0.0021$                  |
| T4     | $0.00019 \pm 0.00057$                |

Table 2. Maximum estimated out-of-plane deformation for the different targets, using the *dynamic* method. The values are mean and standard deviation of the maximum deformation  $\Delta z$  in each image, across all 50 subsets for each target. The small, light target T4 showed the smallest deformations, while the larger targets (T1 and T2), as well as the self-made target T3 showed larger deviations.

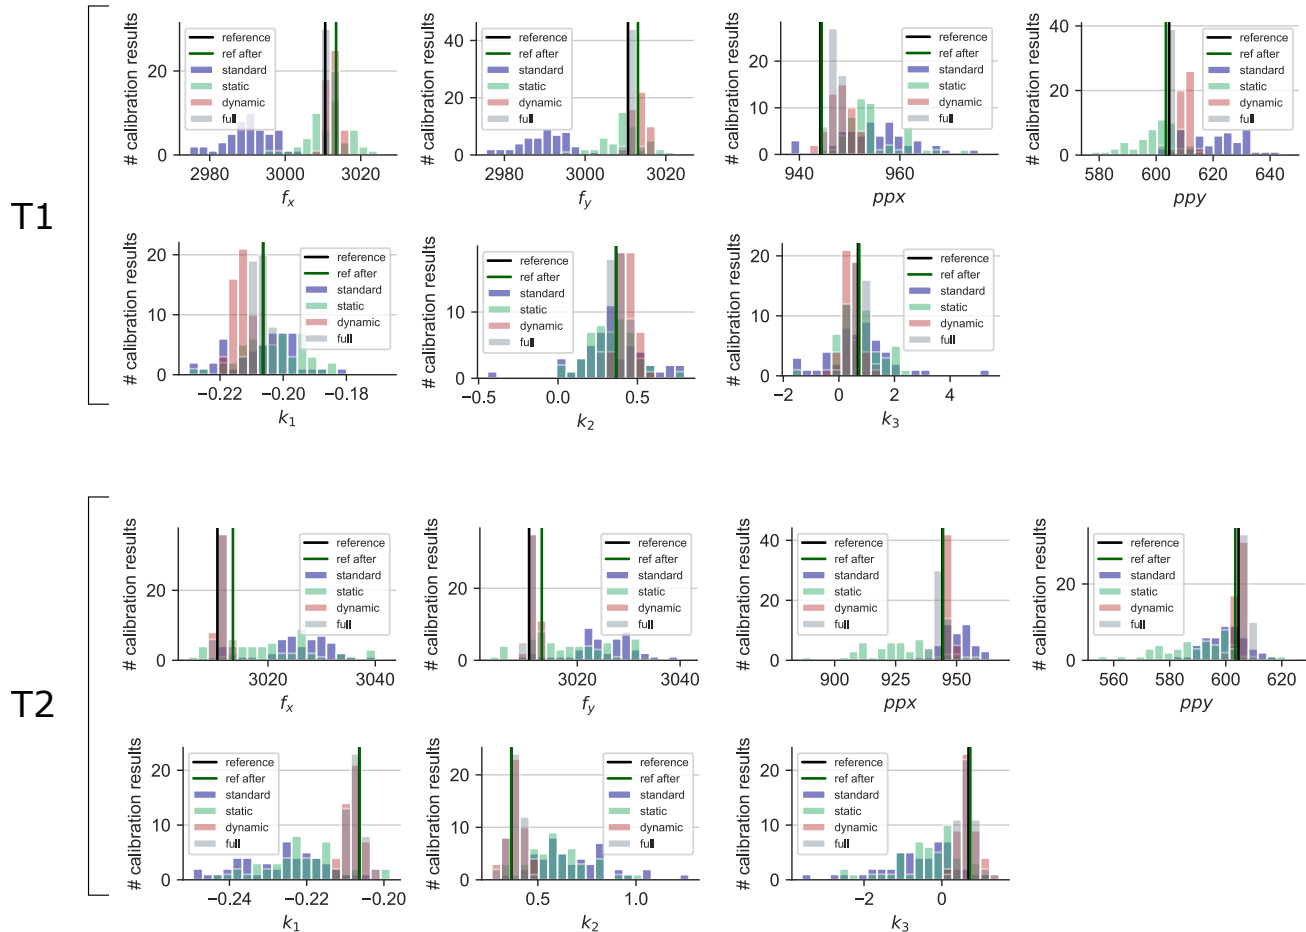

Figure 2. Distribution of estimated intrinsic parameters for targets T1 and T2, using the four different methods *standard*, *static*, *dynamic* and *full*.

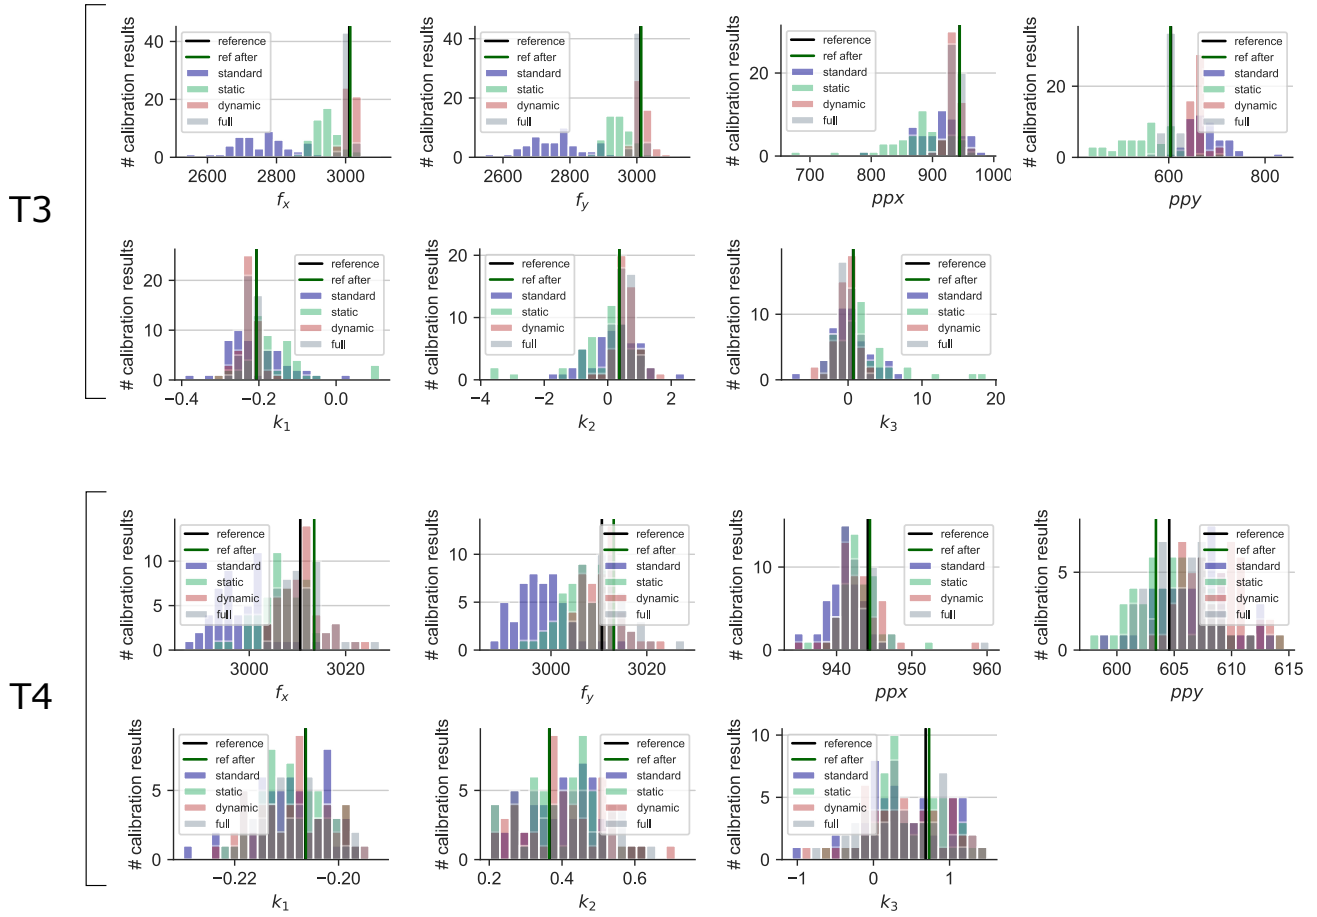

Figure 3. Distribution of estimated intrinsic parameters for targets T3 and T4, using the four different methods *standard*, *static*, *dynamic* and *full*.
